# Supplementary material for: Chitosan-Grafted Carbon Oxynitride Nanoparticles: Investigation of Photocatalytic Degradation and Antibacterial Activity
Source: MDPI journal article supplement (doi:10.3390/polym15071688), 2023-03-28
Supplement: s1 [file s1]

**Table S1.** CrI values for OCN and CS-OCN-3 XRD peaks.

| Samples  | CrI (%) at 2 $\theta$ |      |      |
|----------|-----------------------|------|------|
|          | 12.2                  | 19.9 | 27.4 |
| CN       | 54.8                  | 0    | 86.4 |
| OCN      | 13.6                  | 0    | 82.9 |
| CS-OCN-2 | 46.3                  | 71.9 | 33.6 |
| CS-OCN-3 | 74.6                  | 72.4 | 59.5 |
| CS-OCN-5 | 80.9                  | 30.4 | 88.2 |

**Table S2.** The elemental contents of OCN and CS-OCN-3.

| Name | OCN    | CS-OCN-3 |
|------|--------|----------|
| C1s  | 38.77% | 52.89%   |
| N1s  | 49.01% | 26.66%   |
| O1s  | 12.22% | 20.45%   |

**Table S3.** Comparison of g-C<sub>3</sub>N<sub>4</sub>-based catalysts for dye photodegradation

| Photocatalyst Type<br>(Mass to Solution<br>VolumeRatio)                                         | Dye<br>concentration | Light Source                           | Degradation<br>efficiency | Reference |
|-------------------------------------------------------------------------------------------------|----------------------|----------------------------------------|---------------------------|-----------|
| AgCl/CNTs/g-C <sub>3</sub> N <sub>4</sub> (50<br>mg to 100 mL)                                  | 20 mg/L              | 250 W Xe lamp                          | 86.44% (90<br>min)        | [1]       |
| pCN/TNs                                                                                         | 20 mg/L              | 500 W Xe lamp                          | 86.2% (120<br>min)        | [2]       |
| PoPD/AgCl/g-C <sub>3</sub> N <sub>4</sub> (50<br>mg to 100 mL)                                  | 20 mg/L              | 250W Xe lamp                           | 83.06% (120<br>min)       | [3]       |
| OCN-24-550(50 mg<br>to 50 mL)                                                                   | 20 mg/L              | 300 W Xe<br>lamp ( $\lambda > 420$ nm) | 85.76%<br>(120min)        | [4]       |
| Mo <sub>2</sub> C/g-C <sub>3</sub> N <sub>4</sub> type-I<br>Heterojunction ((30 mg<br>to 30 mL) | 20 mg/L              | 300 W Xe lamp ( $\lambda >$<br>420 nm) | 91.6% (60<br>min)         | [5]       |
| CS/g-C <sub>3</sub> N <sub>4</sub> doped<br>Ba(OH) <sub>2</sub> (10 mg to 40<br>mL)             | 10 mg/L              | visible<br>light (400–800 nm)          | 89.39% (120<br>min)       | [6]       |
| CQD-C <sub>3</sub> N <sub>4</sub>                                                               | 10 mg/L              | 250 W Xe lamp<br>( $\lambda > 420$ nm) | 78.6% (240<br>min)        | [7]       |
| CS-OCN-3((30 mg to 30<br>mL)                                                                    | 40 mg/L              | 200 W Xe<br>lamp ( $\lambda > 420$ nm) | 94.3% (390<br>min)        | This work |

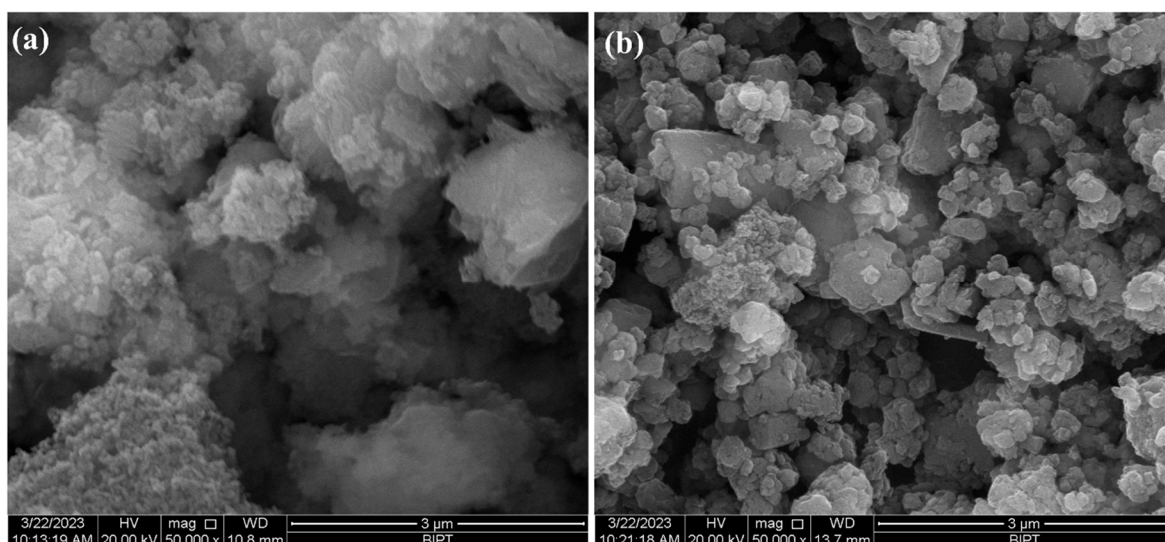

Figure S1. SEM images of (a) OCN and (b) CS-OCN-3.

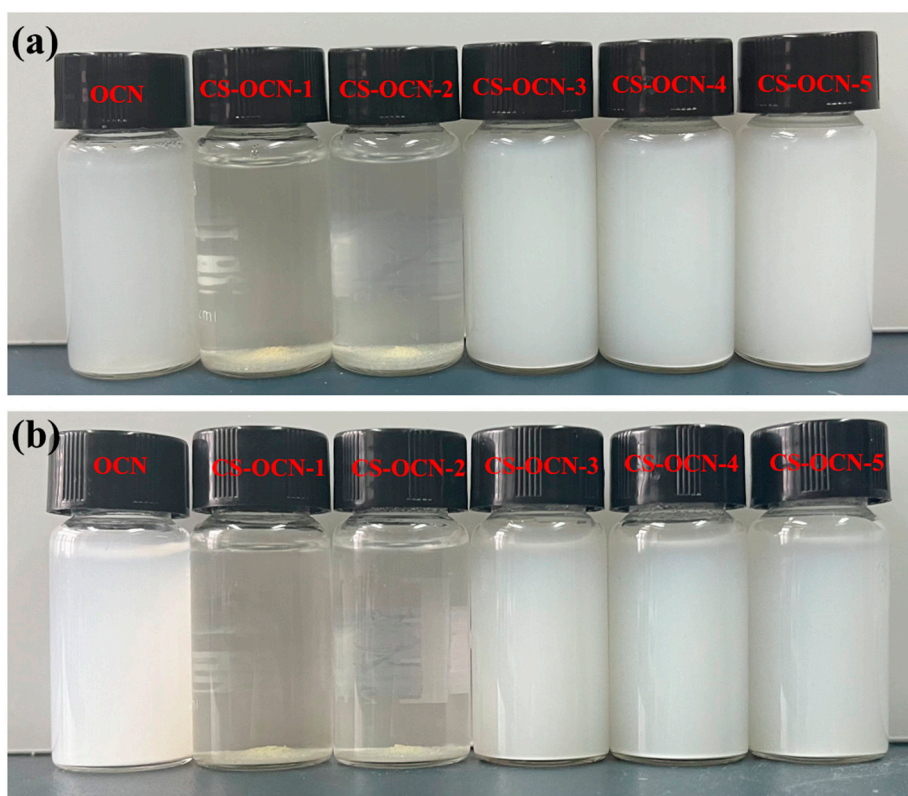

Figure S2.1 mg/mL OCN and CS-OCN nanoparticles dispersing in PBS solution (a) before and (b) after 3 days

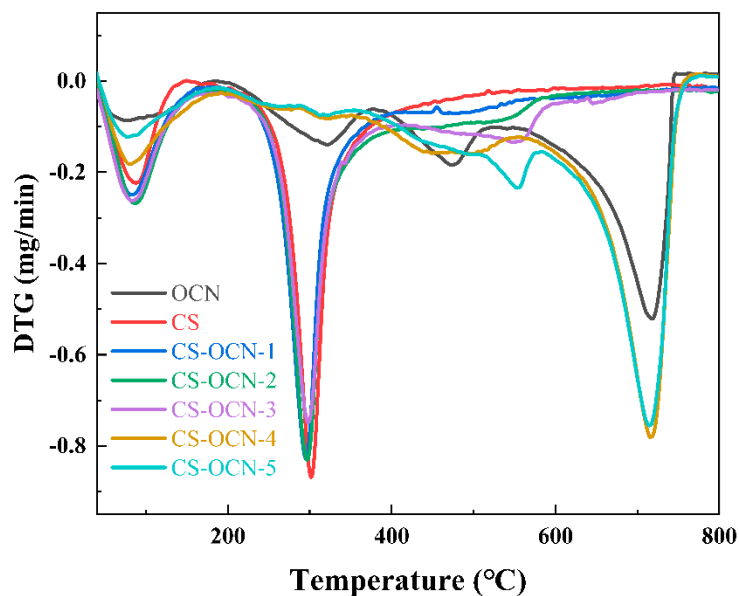

Figure S3. TGA curves of OCN and CS-OCN.

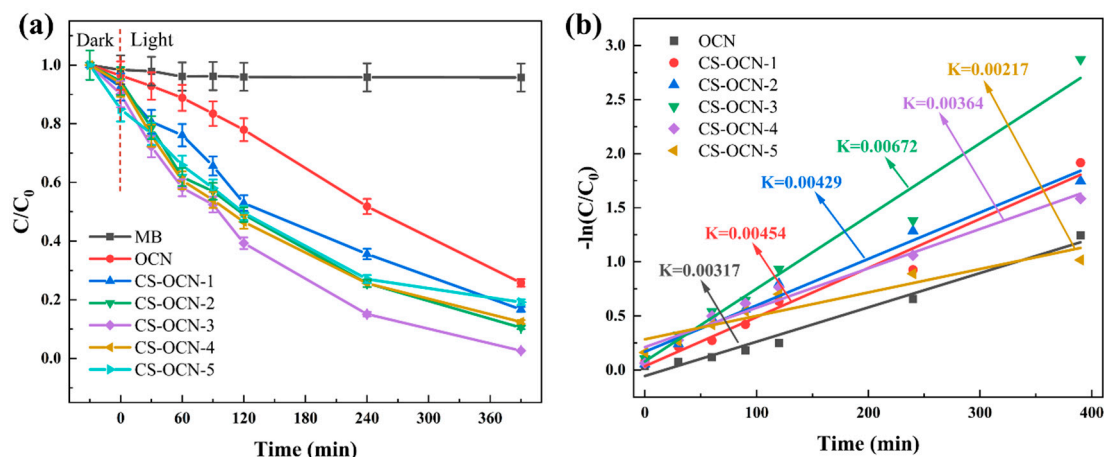

Figure S4. (a) Photocatalytic degradation curves and (b) Primary kinetic fitting curves of CS-OCN for MB

- [1] Liu, C.; Tang, Y.; Huo, P.; Chen, F. Novel AgCl/CNTs/g-C<sub>3</sub>N<sub>4</sub> nanocomposite with high photocatalytic and antibacterial activity, Mater. Lett. 2019, 257, 126708.
- [2] Liu, X.; Yang, Z.; Yang, Y.; Li, H. Construction of carbon quantum dots sensitized porous carbon nitride/titanium dioxide nanosheets for enhancing visible light photocatalytic degradation of tetracycline, J. Environ. Chem. Eng. 2022, 10, 108083.
- [3] Sun, L.; Liu, C.; Li, J.; Zhou, Y.; Wang, H.; Huo, P.; Ma, C.; Yan, Y. Fast electron transfer and enhanced visible light photo-catalytic activity by using poly-o-phenylenediamine modified AgCl/g-C<sub>3</sub>N<sub>4</sub> nanosheets, Chin. J. Catal. 2019, 40, 80-94.
- [4] Guo, H.; Niu, C. G.; Feng, C. Y.; Liang, C.; Zhang, L.; Wen, X. J.; Yang, Y.; Liu, H-Y.; Li, L.; Lin, L. S. Steering exciton dissociation and charge migration in green synthetic oxygen-substituted

ultrathin porous graphitic carbon nitride for boosted photocatalytic reactive oxygen species generation. *Chem. Eng. J.* 2020, 385, 123919.

[5] Zhang, C.; Zhou, Y.; Wang, W.; Yang, Y.; Zhou, C.; Wang, L.; Lei, L.; He, D.; Luo, H.; Huang, D. Formation of Mo<sub>2</sub>C/hollow tubular g-C<sub>3</sub>N<sub>4</sub> hybrids with favorable charge transfer channels for excellent visible-light-photocatalytic performance. *Appl. Surf. Sci.* 2020, 527, 146757.

[6] Ikram, M.; Haider, A.; Naz, S.; Bari, M. A.; Haider, J.; Ul-Hamid, A.; Nabgan, Walid.; Imran, Muhammad.; Nazir, Ghazanfar.; Ali, S. Chitosan and carbon nitride doped barium hydroxide nanoparticles served as dye degrader and bactericidal potential: A molecular docking study. *Int. J. Biol. Macromol.* 2023, 224, 938-949.

[7] Hong, Y.; Meng, Y.; Zhang, G.; Yin, B.; Zhao, Y.; Shi, W.; Li, C. Facile fabrication of stable metal-free CQDs/g-C<sub>3</sub>N<sub>4</sub> heterojunctions with efficiently enhanced visible-light photocatalytic activity. *Sep. Purif. Technol.* 2016, 171, 229-237.
